# Supplementary material for: Dopaminergic Enhancement of Striatal Response to Reward in Major Depression
Source: Atypon-hosted journal article supplement (doi:10.1176/appi.ajp.2016.16010111), 2016-10-24
Supplement: correction.pdf [file correction.pdf]

## Correction Notice

When the article “Dopaminergic Enhancement of Striatal Response to Reward in Major Depression,” by Roe Admon et al. (doi:10.1176/appi.ajp.2016.16010111) was originally posted online on Oct. 24, 2016, some statistics in the first paragraph of the Results section were incorrectly reported. There were no significant main effects or interactions for the repeated-measures ANOVA with learning type as the within-subject variable and diagnosis and drug as between-subject variables. Also, for reward learning, the statistical data reflecting the main effect of diagnosis due to reduced reward learning in the depressed compared with the control group are  $F=6.28$ ,  $df=1, 75$ ,  $p=0.014$ . These errors have been corrected, and the article was reposted on Nov. 4, 2016. The article will appear as amended for its appearance in the April 2017 issue as well as in its online posting as part of that issue.
